# Supplementary material for: Enhanced photoluminescence and energy transfer performance of Y3Al4GaO12:Mn4+,Dy3+ phosphors for plant growth LED lights
Source: Royal Society of Chemistry journal article supplement (doi:10.1039/c9ra00700h), 2019-01-01
Supplement: c9ra00700h1.pdf [file c9ra00700h1.pdf]

**Electronic Supplementary Information to:**

**Enhanced photoluminescence and energy transfer performances of  
 $\text{Y}_3\text{Al}_4\text{GaO}_{12}:\text{Mn}^{4+}, \text{Dy}^{3+}$  phosphors for plant growth LED lights**

Mao Xia,<sup>a,b,c,†</sup> Simin Gu,<sup>a,c,†</sup> Cheng Zhou,<sup>a</sup> Longhai Liu,<sup>a</sup> Yuan Zhong,<sup>a,c</sup>  
Yongli Zhang<sup>a,c</sup> and Zhi Zhou<sup>\*a,c</sup>

<sup>a</sup> College of Science, Hunan Agricultural University, Changsha, 410128, P.R. China. E-mail: zhouzhi@hunan.edu.cn

<sup>b</sup> State Key Laboratory of Metallurgy, Central South University, Changsha, Hunan 410083, P.R. China. E-mail: xiamao2016@csu.edu.cn

<sup>c</sup> The Technology Research Centre of Hunan Optical Agricultural Engineering, Changsha, 410128, P.R. China

<sup>†</sup> These authors contributed equally to this work.

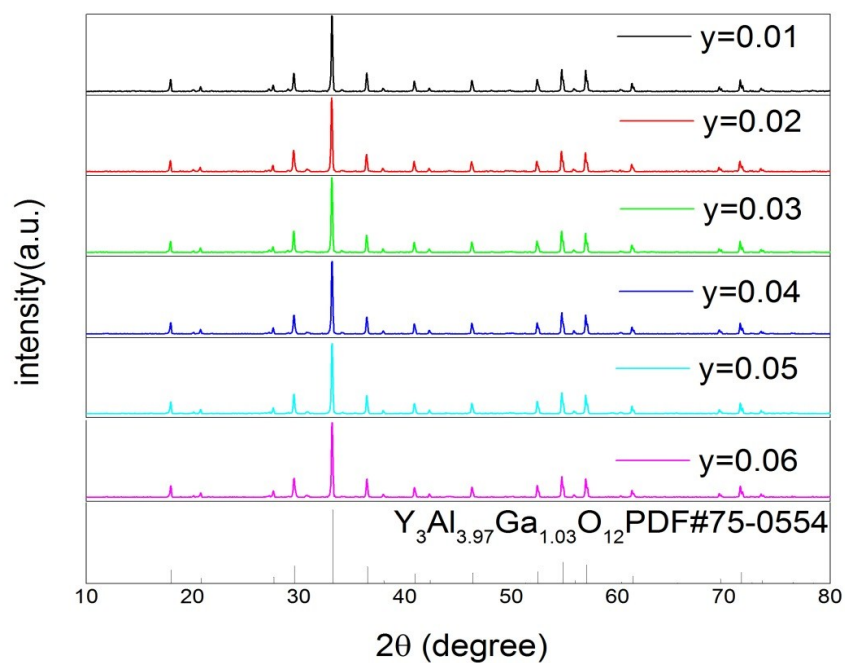

**Figure S1.** The XRD patterns of  $\text{Y}_3\text{Al}_4\text{GaO}_{12}:\text{yDy}^{3+}$  ( $y=0.01-0.06$ ) phosphors and standard card PDF#75-0554 of  $\text{Y}_3\text{Al}_{3.97}\text{Ga}_{1.03}\text{O}_{12}$ .

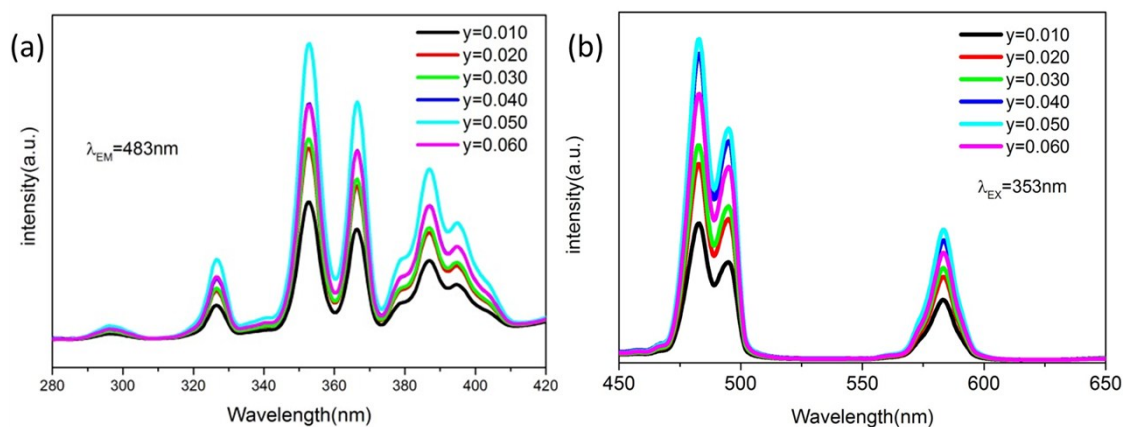

**Figure S2.** The (a) PLE spectra of  $\text{Y}_3\text{Al}_4\text{GaO}_{12}:\text{yDy}^{3+}$  phosphors ( $y=0.01-0.06$ ) and (b) PL spectra of these sample under excitation at 353 nm.

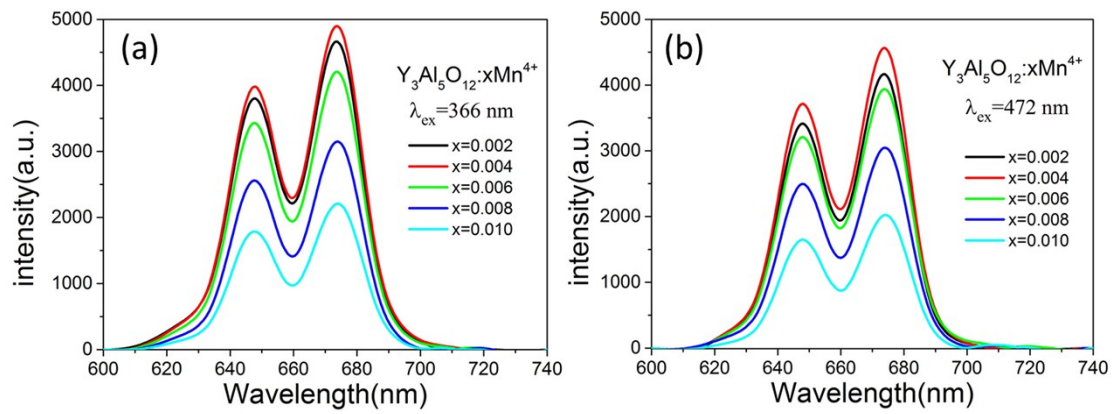

**Figure S3.** The emission spectra of  $Y_3Al_5O_{12}:xMn^{4+}$  when  $x = 0.002, 0.004, 0.006, 0.008, 0.010$  under excitation at (a) 366 nm and (b) 472 nm.

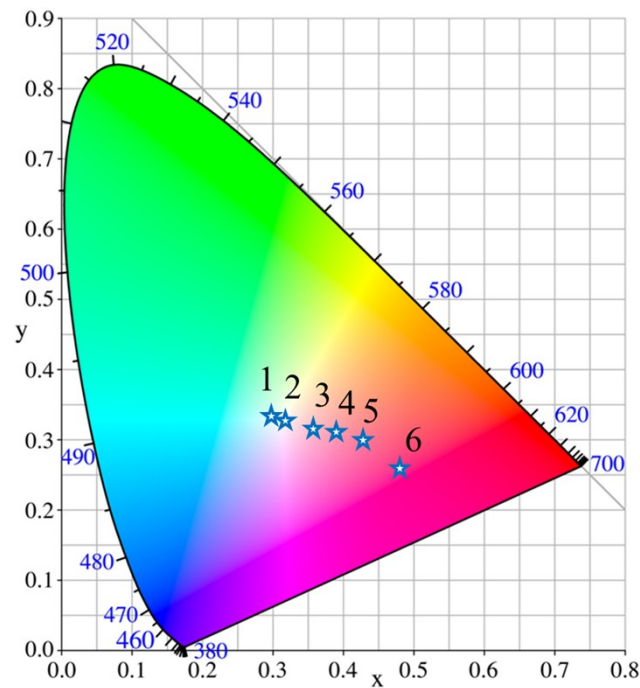

**Figure S4.** The variation of CIE color coordinates of  $YAGO:Mn^{4+}, Dy^{3+}$  based on the PL spectra.
